# Supplementary material for: N,O-Bidentate ligand-tunable copper(ii) complexes as a catalyst for Chan–Lam coupling reactions of arylboronic acids with 1H-imidazole derivatives
Source: Royal Society of Chemistry journal article supplement (doi:10.1039/c8ob02254b), 2018-01-01

*Supporting Information for*

***N,O*-Bidentate ligand-tunable copper(II) complexes as catalyst  
for Chan-Lam coupling reactions of arylboronic acids with  
1*H*-imidazole derivatives**

Xuefeng Jia,\* and Pai Peng

*Key Laboratory of Magnetic Molecules and Magnetic Information Materials of  
Ministry of Education, School of Chemical and Material Science, Shanxi Normal  
University, Linfen, 041004, China,  
E-mail: jxfliu@163.com*

## Table of Contents

|                                                               |            |
|---------------------------------------------------------------|------------|
| <b>1. General experimental information.....</b>               | <b>S3</b>  |
| <b>2. NMR data of the products (3aa-3ak) .....</b>            | <b>S3</b>  |
| <b>3. NMR data of the products (3ba-3ia) .....</b>            | <b>S6</b>  |
| <b>4. References.....</b>                                     | <b>S9</b>  |
| <b>5. NMR Spectral Copies of the products (3aa-3ak) .....</b> | <b>S11</b> |
| <b>6. NMR Spectral Copies of the products (3ba-3ia) .....</b> | <b>S22</b> |

## 1. General experimental information

All coupling reactions were performed under air conditions. Imidazole derivatives and arylboronic Acids were purchased and directly used without purification. The solvents were distilled prior to use. Preparative thin layer chromatography was performed on GF-254 silica gel. The  $^1\text{H}$  NMR and  $^{13}\text{C}$  NMR spectra were recorded on a Bruker-600 spectrometer using  $\text{CDCl}_3$  as the solvent at 600 and 150 MHz, respectively. Chemical shifts are given as  $\delta$  value with  $(\text{CH}_3)_4\text{Si}$  as the internal standard. The coupling constants ( $J$ ) are reported in Hertz (Hz). HRMS data were obtained by ESI on a TOF mass spectrometer.

## 2. NMR data of the products (3aa-3ak)

**1-Phenyl-1H-benzimidazole (3aa).**<sup>1,2</sup> Slightly yellow oil (39.6 mg, 92% yield);  $^1\text{H}$  NMR (600 MHz,  $\text{CDCl}_3$ ):  $\delta$  8.17 (s, 1H), 7.93 (dd,  $J = 2.4, 6.6$  Hz, 1H), 7.58 (t,  $J = 7.8$  Hz, 2H), 7.55-7.51 (m, 3H), 7.48 (t,  $J = 7.8$  Hz, 1H), 7.36-7.34 (m, 2H);  $^{13}\text{C}$  NMR (150 MHz,  $\text{CDCl}_3$ ):  $\delta$  142.21, 136.14, 133.64, 130.13, 128.28, 127.46, 124.16, 123.97, 123.15, 120.43, 110.62.

**1-(4-Methylphenyl)-1H-benzimidazole (3ab).**<sup>1</sup> Pale yellow solid (43.8 mg, 96% yield); mp: 114-115 °C;  $^1\text{H}$  NMR (600 MHz,  $\text{CDCl}_3$ ):  $\delta$  8.10 (s, 1H), 7.88-7.87 (m, 1H), 7.51-7.49 (m, 1H), 7.39-7.35 (m, 4H), 7.33-7.31 (m, 2H), 2.45 (s, 3H);  $^{13}\text{C}$  NMR (150 MHz,  $\text{CDCl}_3$ ):  $\delta$  143.87, 142.44, 138.17, 133.89, 133.76, 130.59, 124.02, 123.63, 122.73, 120.51, 110.51, 21.14.

***1-(4-*t*-Butylphenyl)-1H-benzimidazole (3ac)***.<sup>3</sup> Pale yellow solid (50.8 mg, 94% yield); mp: 108-109 °C; <sup>1</sup>H NMR (600 MHz, CDCl<sub>3</sub>): δ 8.11 (s, 1H), 7.89 (dd, *J* = 1.8, 6.0 Hz, 1H), 7.57 (d, *J* = 8.4 Hz, 2H), 7.54 (dd, *J* = 2.4, 6.6 Hz, 1H), 7.43 (d, *J* = 8.4 Hz, 2H), 7.33-7.31(m, 2H), 1.39 (s, 9H); <sup>13</sup>C NMR (150 MHz, CDCl<sub>3</sub>): δ 151.35, 143.89, 142.45, 133.86, 133.70, 126.94, 123.72, 123.62, 122.74, 120.51, 110.61, 34.80, 31.35.

***1-(4-Methoxyphenyl)-1H-benzimidazole (3ad)***.<sup>2, 4</sup> Pale yellow solid (43 mg, 88% yield); mp: 93-94 °C (lit.<sup>13</sup> 96-97 °C); <sup>1</sup>H NMR (600 MHz, CDCl<sub>3</sub>): δ 7.99 (s, 1H), 7.81 (dd, *J* = 1.8, 6.6 Hz, 1H), 7.37-7.36 (m, 1H), 7.33 (d, *J* = 9.0 Hz, 2H), 7.25-7.23(m, 2H), 6.99(d, *J* = 9.0 Hz, 2H), 3.81 (s, 3H); <sup>13</sup>C NMR (150 MHz, CDCl<sub>3</sub>): δ 158.37, 141.44, 133.19, 128.02, 124.73, 122.59, 121.68, 119.39, 114.11, 111.95, 109.37, 54.62.

***1-(2-Methylphenyl)-1H-benzimidazole (3ae)***.<sup>5</sup> Pale yellow solid (39.7 mg, 87% yield); mp: 164-165 °C; <sup>1</sup>H NMR (600 MHz, CDCl<sub>3</sub>): δ 7.97 (s, 1H), 7.89 (d, *J* = 7.8 Hz, 1H), 7.45-7.42 (m, 2H), 7.38-7.36 (m, 1H), 7.34-7.31 (m, 2H), 7.28-7.26 (m, 1H), 7.14 (d, *J* = 8.4 Hz, 1H), 2.11 (s, 3H); <sup>13</sup>C NMR (150 MHz, CDCl<sub>3</sub>): δ 143.30, 142.98, 135.40, 134.77, 134.72, 131.54, 129.35, 127.69, 127.19, 123.53, 122.51, 120.42, 110.52, 17.62.

***1-(3-Benzyloxyphenyl)-1H-benzimidazole (3af)***. Pale yellow solid (62.7 mg, 98% yield); mp: 102-103 °C; <sup>1</sup>H NMR (600 MHz, CDCl<sub>3</sub>): δ 8.10 (s, 1H), 7.87 (d, *J* = 7.8 Hz, 1H), 7.45-7.44 (m, 2H), 7.43 (d, *J* = 1.8

Hz, 2H), 7.41-7.39 (m, 2H), 7.36-7.35 (m, 1H), 7.32 (dd,  $J = 1.2, 7.8$  Hz, 1H), 7.30 (dd,  $J = 1.8, 8.4$  Hz, 1H), 7.10-7.05 (m, 3H), 5.13 (s, 2H);  $^{13}\text{C}$  NMR (150 MHz,  $\text{CDCl}_3$ ):  $\delta$  159.86, 144.01, 142.24, 137.40, 136.30, 133.54, 130.91, 128.79, 128.27, 127.47, 123.76, 122.87, 120.60, 116.27, 114.52, 110.78, 110.64, 70.35. HRMS (ESI)  $m/z$ : calcd for  $\text{C}_{20}\text{H}_{16}\text{N}_2\text{O}$  [ $\text{M} + \text{H}$ ] $^+$  301.1341 found 301.1335.

***1-(4-Fluorophenyl)-1H-benzimidazole (3ag)***.<sup>3</sup> Slightly yellow oil (45.5 mg, 98% yield);  $^1\text{H}$  NMR (600 MHz,  $\text{CDCl}_3$ ):  $\delta$  8.08 (s, 1H), 7.89 (dd,  $J = 1.8, 5.4$  Hz, 1H), 7.49-7.45 (m, 3H), 7.36-7.33 (m, 2H), 7.27 (dd,  $J = 2.4, 6.0$  Hz, 2H);  $^{13}\text{C}$  NMR (150 MHz,  $\text{CDCl}_3$ ):  $\delta$  162.86, 161.21, 143.81, 142.33, 133.91, 132.36 ( $J = 3.0$  Hz), 126.11 ( $J = 9.0$  Hz), 123.89, 122.96, 120.66, 117.14, 116.99, 110.19.

***1-(3-Chlorophenyl)-1H-benzimidazole (3ah)***. Slightly yellow oil (45.3 mg, 97% yield);  $^1\text{H}$  NMR (600 MHz,  $\text{CDCl}_3$ ):  $\delta$  8.11 (t,  $J = 2.4$  Hz, 1H), 7.89-7.87 (m, 1H), 7.55-7.49 (m, 3H), 7.45-7.40 (m, 2H), 7.36-7.34 (m, 2H);  $^{13}\text{C}$  NMR (150 MHz,  $\text{CDCl}_3$ ):  $\delta$  144.01, 141.99, 137.46, 135.75, 133.35, 131.13, 128.21, 124.17, 124.06, 123.16, 122.08, 120.79, 110.32. HRMS (ESI-TOF)  $m/z$ : calcd for  $\text{C}_{13}\text{H}_9\text{N}_2\text{Cl}$  [ $\text{M} + \text{H}$ ] $^+$  229.0532, found 229.0538.

***1-(3-Nitrophenyl)-1H-benzimidazole (3ai)***. Pale yellow solid (37.3 mg, 72% yield); mp: 172-173  $^\circ\text{C}$ ;  $^1\text{H}$  NMR (600 MHz,  $\text{CDCl}_3$ ):  $\delta$  8.43 (s, 1H), 8.33 (dd,  $J = 1.2, 8.4$  Hz, 1H), 8.18 (s, 1H), 7.90-7.89 (m, 2H), 7.81 (t,  $J$

= 7.8 Hz, 1H), 7.56 (t,  $J = 4.8$  Hz, 1H), 7.39 (t,  $J = 4.8$  Hz, 2H);  $^{13}\text{C}$  NMR (150 MHz,  $\text{CDCl}_3$ ):  $\delta$  149.26, 144.17, 141.72, 137.52, 133.08, 131.23, 129.44, 124.49, 123.56, 122.58, 121.07, 118.72, 110.01. HRMS (ESI-TOF)  $m/z$ : calcd for  $\text{C}_{13}\text{H}_9\text{N}_3\text{O}_2$   $[\text{M} + \text{H}]^+$  240.0773, found 240.0768.

***1-Naphthyl-1H-benzimidazole (3aj)***.<sup>6</sup> Pale yellow solid (49.1 mg, 93% yield); mp: 72-73 °C;  $^1\text{H}$  NMR (600 MHz,  $\text{CDCl}_3$ ):  $\delta$  8.14 (s, 1H), 8.04 (d,  $J = 8.4$  Hz, 1H), 8.00 (d,  $J = 8.4$  Hz, 1H), 7.95 (d,  $J = 8.4$  Hz, 1H), 7.62 (t,  $J = 7.8$  Hz, 1H), 7.59-7.55 (m, 2H), 7.46-7.42 (m, 2H), 7.36 (t,  $J = 8.4$  Hz, 1H), 7.25 (t,  $J = 7.2$  Hz, 1H), 7.10 (d,  $J = 8.4$  Hz, 1H);  $^{13}\text{C}$  NMR (150 MHz,  $\text{CDCl}_3$ ):  $\delta$  143.79, 143.40, 135.67, 134.46, 132.39, 129.82, 129.71, 128.50, 127.58, 127.09, 125.50, 124.96, 123.64, 122.73, 122.59, 120.60, 110.85.

***1-Thienyl-1H-benzimidazole (3ak)***.<sup>7</sup> Pale yellow solid (39.2 mg, 89% yield); mp: 48-49 °C;  $^1\text{H}$  NMR (600 MHz,  $\text{CDCl}_3$ ):  $\delta$  8.08 (s, 1H), 7.87-7.85 (m, 1H), 7.57-7.55 (m, 1H), 7.37-7.35 (m, 2H), 7.32 (dd,  $J = 1.2, 5.4$  Hz, 1H), 7.17 (dd,  $J = 1.2, 3.6$  Hz, 1H), 7.12 (dd,  $J = 3.6, 5.4$  Hz, 1H);  $^{13}\text{C}$  NMR (150 MHz,  $\text{CDCl}_3$ ):  $\delta$  143.19, 132.33, 130.92, 128.85, 126.44, 124.13, 123.44, 123.20, 121.94, 120.16, 110.53.

### 3. NMR data of the products (3ba-3ia)

***1-Phenyl-1H-imidazole (3ba)***.<sup>1,13</sup> Pale yellow solid (27.7 mg, 96% yield); mp: 52-53 °C (lit.<sup>13</sup> 54-55 °C);  $^1\text{H}$  NMR (600 MHz,  $\text{CDCl}_3$ ):  $\delta$  7.88

(s, 1H), 7.49 (t,  $J = 8.4$  Hz, 2H), 7.40 (d,  $J = 7.8$  Hz, 2H), 7.33 (d,  $J = 7.8$  Hz, 1H), 7.29 (s, 1H), 7.22 (s, 1H);  $^{13}\text{C}$  NMR (150 MHz,  $\text{CDCl}_3$ ):  $\delta$  137.38, 135.65, 130.40, 129.91, 127.54, 121.54, 118.29.

***1-Phenyl-4-methyl-1H-imidazole (3ca)***.<sup>8</sup> Pale yellow solid (26.6 mg, 84% yield); mp: 58-59 °C (lit:<sup>8</sup> 61-63 °C);  $^1\text{H}$  NMR (600 MHz,  $\text{CDCl}_3$ ):  $\delta$  7.76 (s, 1H), 7.46 (t,  $J = 7.8$  Hz, 2H), 7.36(d,  $J = 7.8$  Hz, 2H), 7.33(d,  $J = 7.8$  Hz, 1H), 7.01 (s, 1H), 2.30 (s, 3H);  $^{13}\text{C}$  NMR (150 MHz,  $\text{CDCl}_3$ ):  $\delta$  139.53, 137.51, 134.54, 130.45, 129.83, 127.12, 122.02, 121.11, 114.63, 13.7.

***1-Phenyl-4-nitro-1H-imidazole (3da)***.<sup>9</sup> Pale yellow solid (28.7 mg, 76% yield); mp: 184-185 °C (lit:<sup>9</sup> 187-188 °C);  $^1\text{H}$  NMR (600 MHz,  $\text{CDCl}_3$ ):  $\delta$  8.09 (d,  $J = 8.4$  Hz, 1H), 7.73(d,  $J = 7.2$  Hz, 2H), 7.70 (d,  $J = 8.4$  Hz, 1H), 7.56 (t,  $J = 7.8$  Hz, 2H) , 7.38 (t,  $J = 7.2$  Hz, 1H);  $^{13}\text{C}$  NMR (150 MHz,  $\text{CDCl}_3$ ):  $\delta$  145.53, 131.32, 128.86, 127.66, 127.22, 123.37, 121.90, 119.34, 109.34.

***1-Phenyl-2-chloromethyl-1H-benzimidazole(3ea)***.<sup>10</sup> Pale yellow solid (39.2 mg, 81% yield); mp: 98-99 °C;  $^1\text{H}$  NMR (600 MHz,  $\text{CDCl}_3$ ):  $\delta$  7.85 (d,  $J = 7.8$  Hz, 1H), 7.57 (d,  $J = 7.8$  Hz, 2H), 7.53 (dd,  $J = 1.2, 5.4$  Hz, 1H), 7.49-7.47 (m, 2H), 7.33-7.30 (m, 1H), 7.28 (dd,  $J = 1.2, 8.4$  Hz, 1H), 7.23 (d,  $J = 7.8$  Hz, 1H), 4.58 (s, 2H) ;  $^{13}\text{C}$  NMR (150 MHz,  $\text{CDCl}_3$ ):  $\delta$  150.22, 142.29, 136.46, 135.68, 129.77, 128.86, 126.93, 123.63, 122.81, 120.11, 110.58, 66.27, 58.39.

***1-Phenyl-2-mercapto-1H-benzimidazole (3fa)***. Pale yellow solid (42.1 mg, 93% yield); mp: 124-125 °C; <sup>1</sup>H NMR (600 MHz, CDCl<sub>3</sub>): δ 8.13(s, 1H), 7.89-7.88 (m, 1H), 7.59 (t, *J* = 8.4 Hz, 2H), 7.56-7.54 (m, 1H), 7.53 (dd, *J* = 1.2, 8.4 Hz, 2H), 7.48 (t, *J* = 7.2 Hz, 1H), 7.36-7.33 (m, 2H); <sup>13</sup>C NMR (150 MHz, CDCl<sub>3</sub>): δ 144.05, 142.31, 136.39, 133.73, 130.08, 128.07, 124.10, 123.72, 122.83, 120.63, 110.48. HRMS (ESI-TOF) *m/z*: calcd for C<sub>13</sub>H<sub>10</sub>N<sub>2</sub>S [M + H]<sup>+</sup> 227.0643, found 227.0651.

***1-Phenyl-2-acetonitrile-1H-benzimidazole (3ga)***.<sup>11</sup> Pale yellow solid (34 mg, 73% yield); mp: 115-116 °C (lit.<sup>11</sup> 118-120 °C); <sup>1</sup>H NMR (600 MHz, CDCl<sub>3</sub>): δ 8.09(d, *J* = 7.8 Hz, 1H), 7.74 - 7.72 (m, 2H), 7.07 (d, *J* = 8.4 Hz, 1H), 7.55 (dd, *J* = 1.8, 7.2 Hz, 2H), 7.50-7.48 (m, 1H), 7.45 (t, *J* = 7.8 Hz, 1H), 7.38 (dd, *J* = 0.6, 7.8 Hz, 1H), 4.05 (d, *J* = 7.2 Hz, 2H); <sup>13</sup>C NMR (150 MHz, CDCl<sub>3</sub>): δ 170.14, 145.53, 136.02, 131.32, 129.90, 128.86, 127.66, 127.22, 123.37, 121.90, 119.35, 109.35, 59.38.

***1-Phenyl-1H-1,2,4-triazole (3ha)***.<sup>8, 12</sup> Pale yellow solid (27.9 mg, 96% yield); mp: 42-43 °C (lit.<sup>8</sup> 44-44.5 °C); <sup>1</sup>H NMR (600 MHz, CDCl<sub>3</sub>): δ 8.54 (s, 1H), 8.08 (s, 1H), 7.61 (d, *J* = 7.8 Hz, 1H), 7.45 (t, *J* = 7.8 Hz, 1H), 7.38 (t, *J* = 7.2 Hz, 1H), 7.35 (t, *J* = 7.2 Hz, 1H); <sup>13</sup>C NMR (150 MHz, CDCl<sub>3</sub>): δ 152.01, 136.87, 134.53, 130.99, 129.86, 128.48, 127.78, 120.18.

***1-Phenyl-1H-benzotriazole (3ia)***.<sup>8</sup> Pale yellow solid (34.7 mg, 89% yield); mp: 88-89 °C (lit.<sup>8</sup> 85-86 °C) <sup>1</sup>H NMR (600 MHz, CDCl<sub>3</sub>): δ 8.08



(d,  $J = 8.4$  Hz, 1H), 7.72 (dd,  $J = 1.2, 9.0$  Hz, 2H), 7.68 (d,  $J = 8.4$  Hz, 1H), 7.55 (t,  $J = 7.8$  Hz, 2H), 7.48 (dt,  $J = 0.6, 6.6$  Hz, 1H), 7.45-7.42 (m, 1H), 7.37 (dt,  $J = 1.2, 7.2$  Hz, 1H);  $^{13}\text{C}$  NMR (150 MHz,  $\text{CDCl}_3$ ):  $\delta$  146.54, 137.04, 132.34, 129.88, 128.68, 128.25, 124.40, 122.91, 120.35, 110.38.

#### 4. References

- [1] L. Liang, Z. Li and X. Zhou. *Org. Lett.*, 2009, **11**, 3294-3297.
- [2] J. Wei, W. Song, Y. Zhu, B. Wei and L. Xuan, *Tetrahedron*, 2018, **74**, 19-27.
- [3] R. A. Altman, E. D. Koval and S. L. Buchwald, *J. Org. Chem.*, 2007, **72**, 6190-6199.
- [4] K. Yang, Y. Qiu, Z. Li, Z. Wang and S. Jiang, *J. Org. Chem.*, 2011, **76**, 3151-3159.
- [5] M. T. Wentzel, J. B. Hewgley, R. M. Kamble, P. D. Wall and M. C. Kozłowska, *Adv. Synth. Catal.*, 2009, **351**, 931-937.
- [6] P. J. Amal Joseph, S. Priyadarshini, M. Lakshmi Kantam and H. Maheswaran, *Catal. Sci. Technol.*, **2011**, 1, 234-238.
- [7] X. Lv, Z. Wang and W. Bao, *Tetrahedron*, 2006, **62**, 4756-4761.
- [8] J. C. Antilla, J. M. Baskin and T. E. Barder, *J. Org. Chem.*, 2004, **69**, 5578-5587.
- [9] M. K. Kurpet, A. Dąbrowska, M. M. Jarosz, K. Kajewska-Kania, N. Kuźnik and J. W. Suwiński, *Beilstein J. Org. Chem.*, 2013, **9**,

1517–1525.

[10] J. D. Nobbs, A. K. Tomov and C. T. Young, *Catal. Sci. Technol.*, 2018, **8**, 1314-1321.

[11] M. Hranjec, E. Horak, M. Tireli, G. Pavlovic and G. Karminski-Zamola, *Synthesis, Dyes and Pigments*, 2012, **95**, 644-656.

[12] H. J. Cristau, P. P. Cellier, J. F. Spindler and M. Taillefer, *Chem. Eur. J.*, 2004, **10**, 5607-5622.

[13] H.-G. Lee, J.-E. Won, M.-J. Kim, S.-E. Park, K.-J. Jung, B. R. Kim, S.-G. Lee and Y.-J. Yoon, *J. Org. Chem.*, 2009, **74**, 5675–5678.

## 5. NMR Spectral Copies of the products (3aa-3ak)

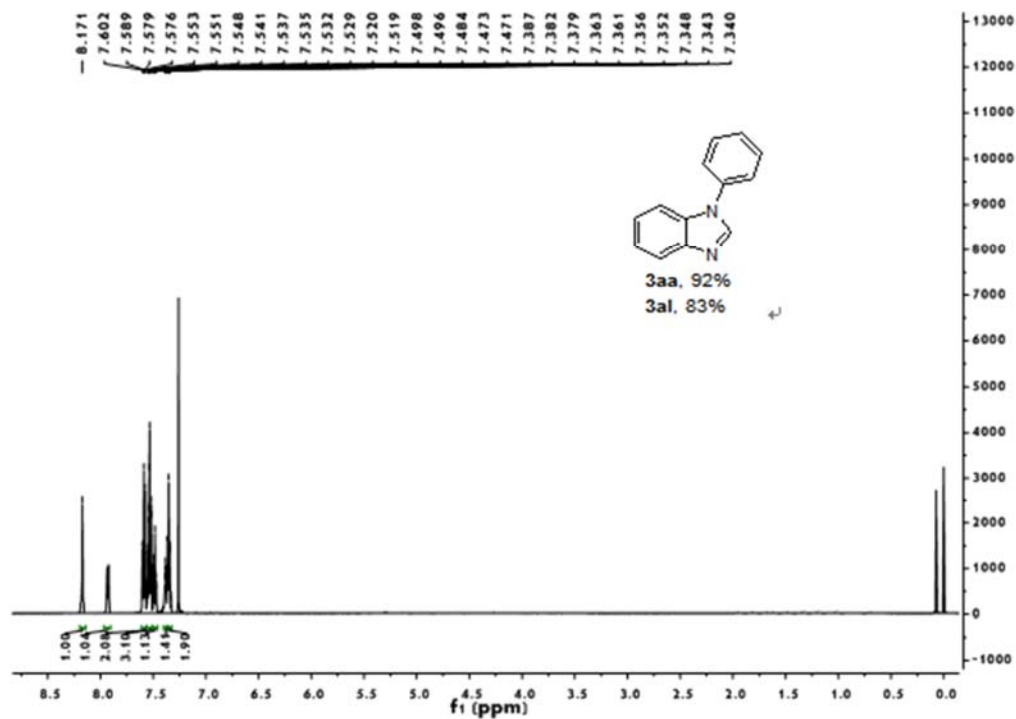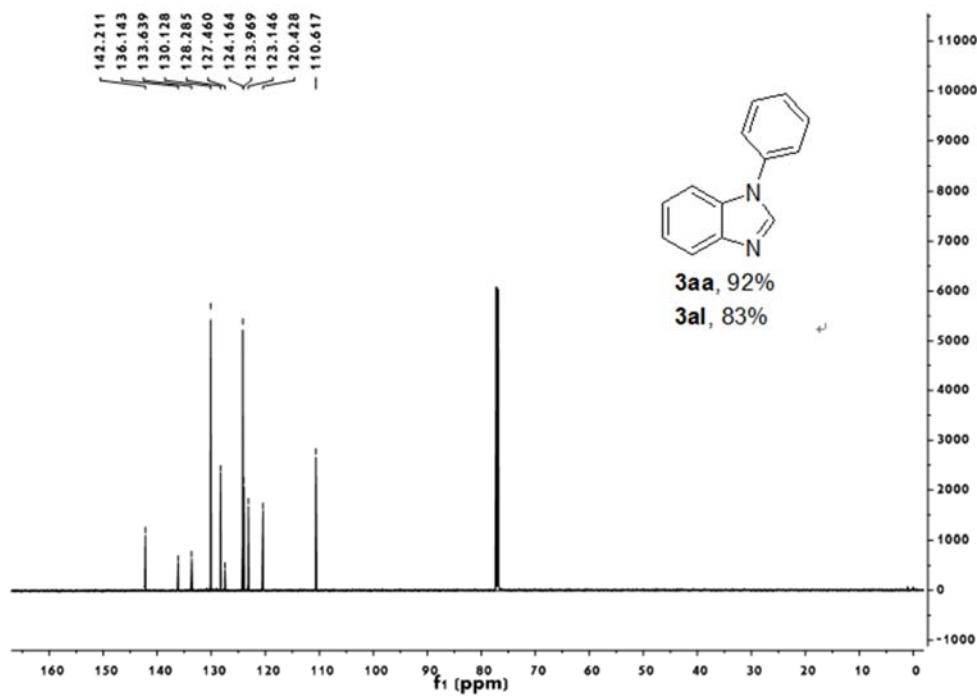

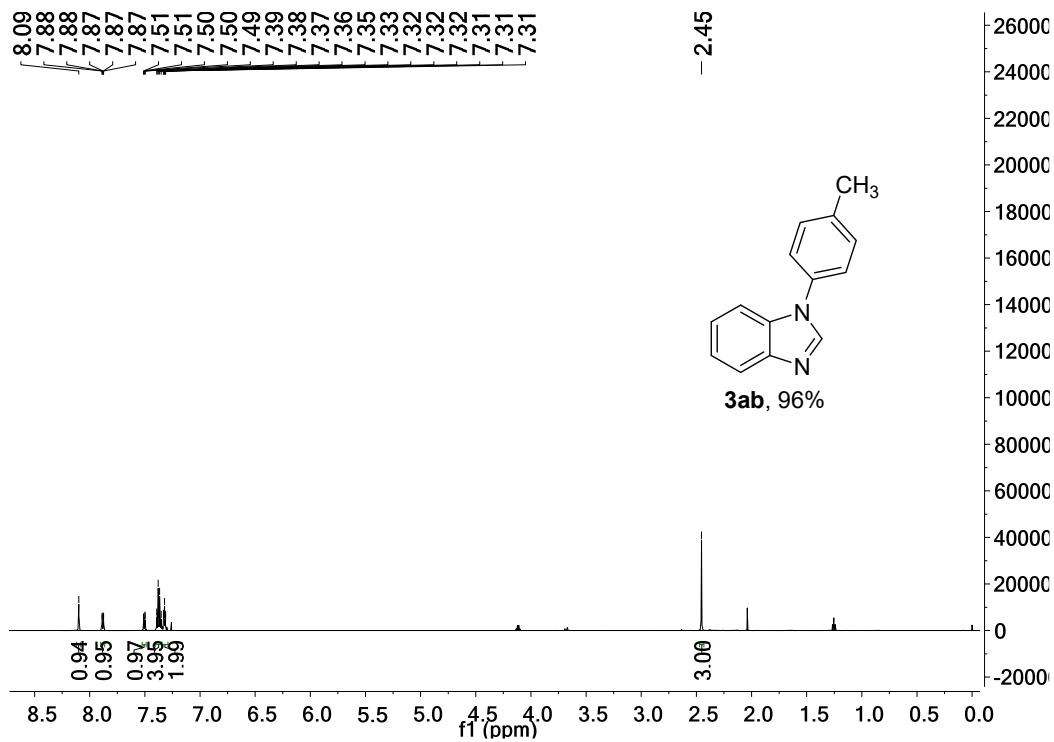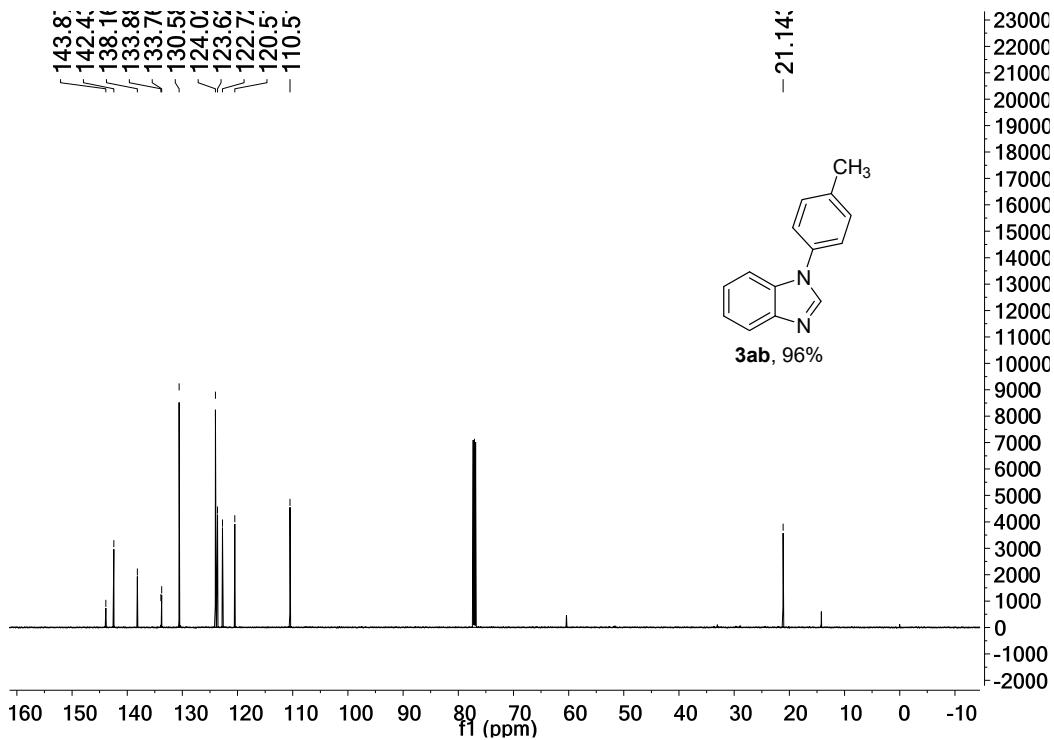

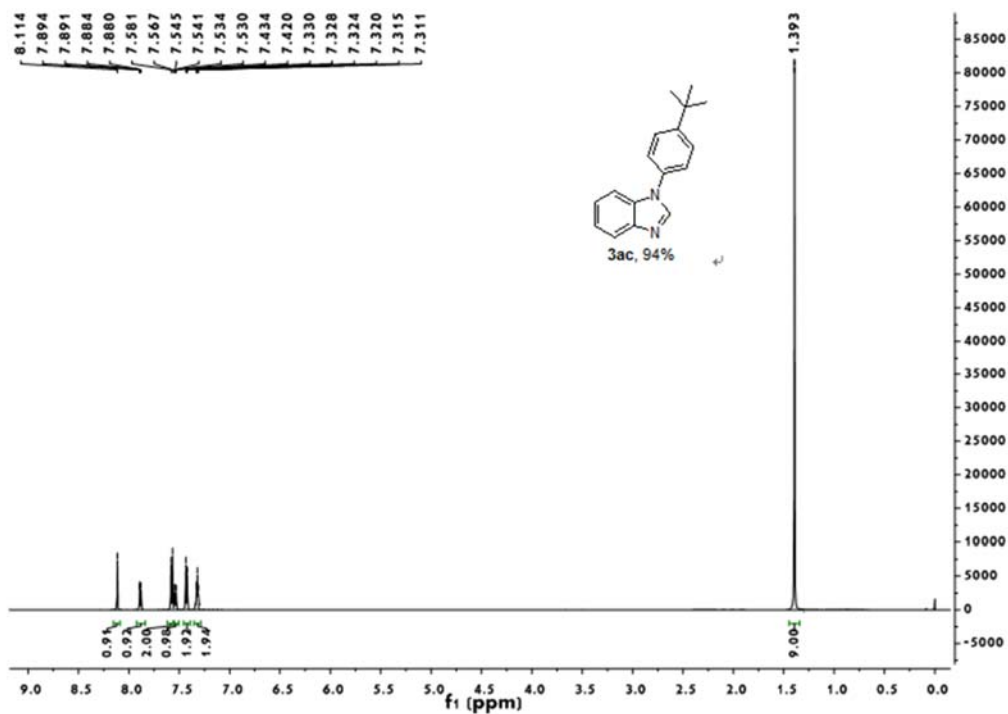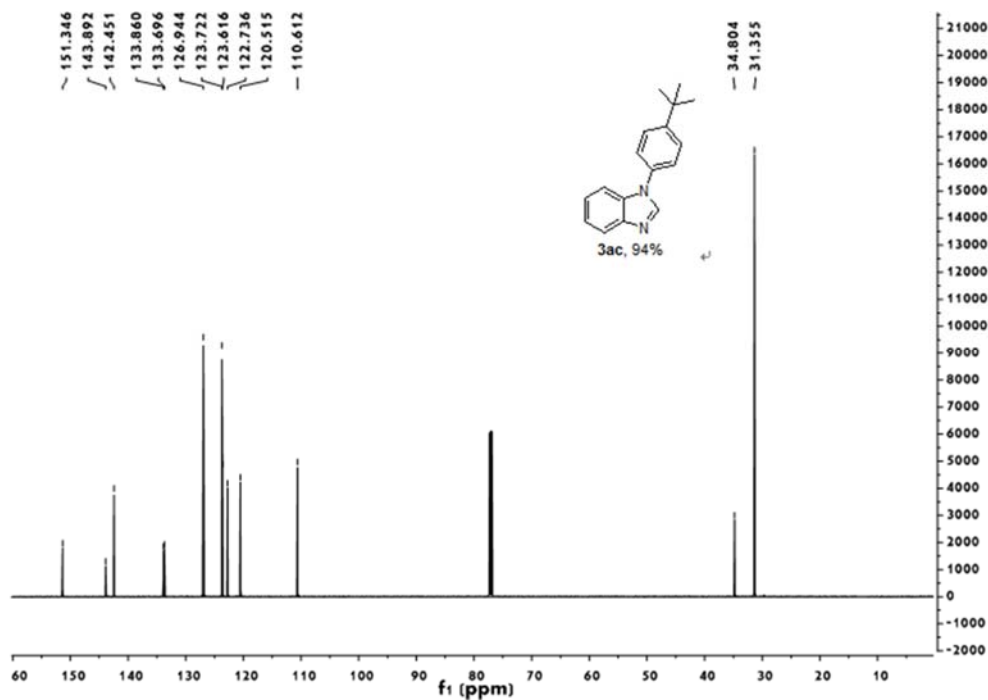

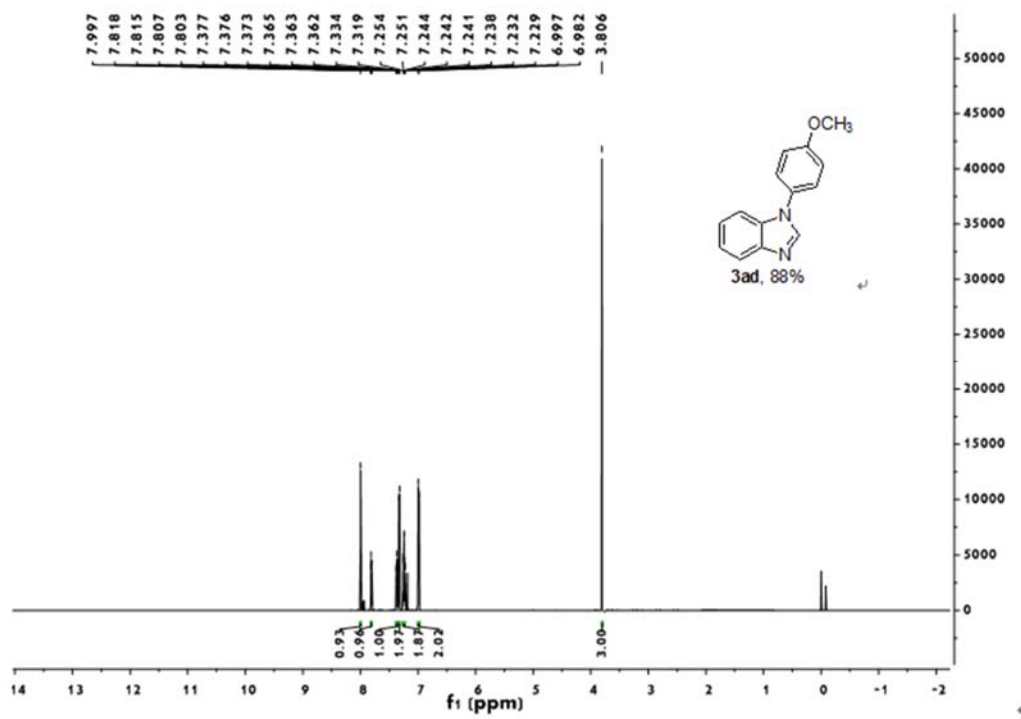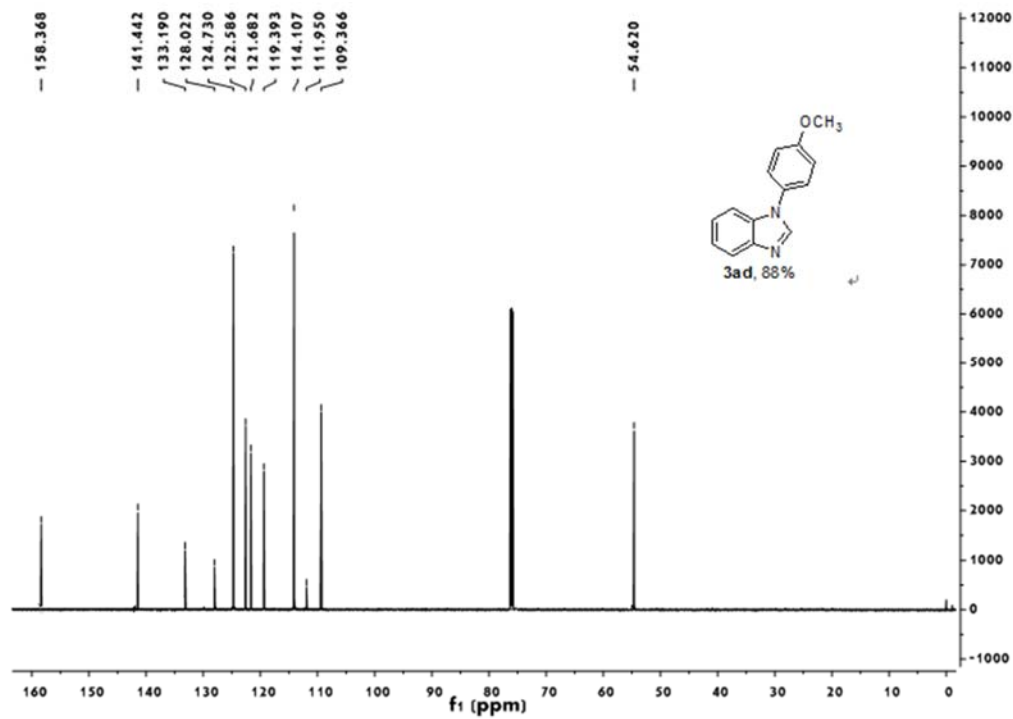

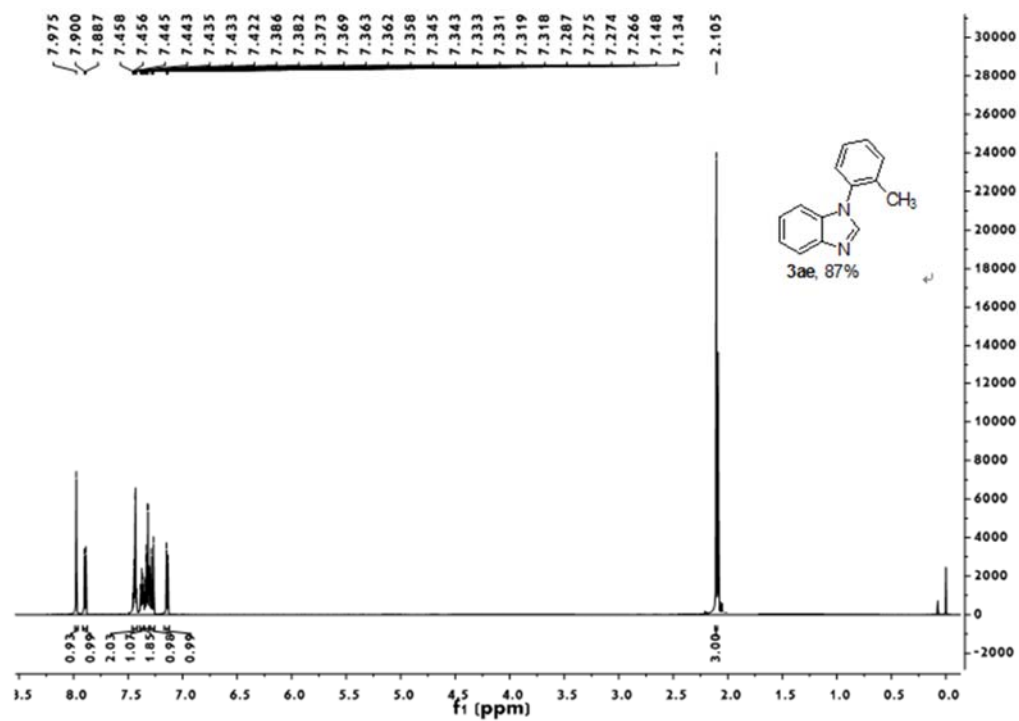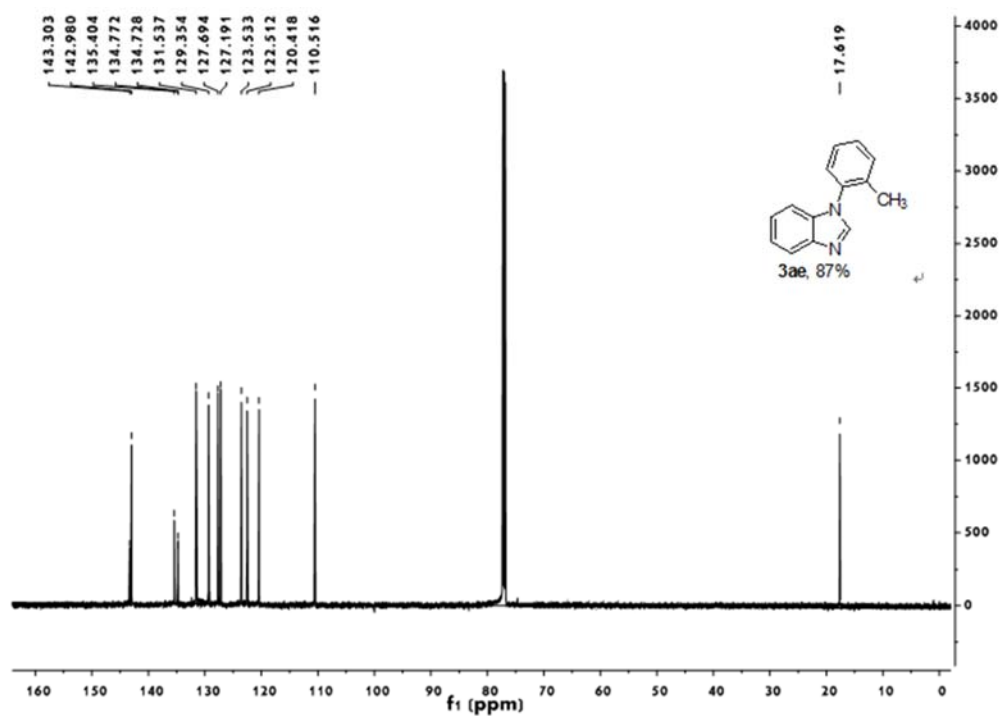

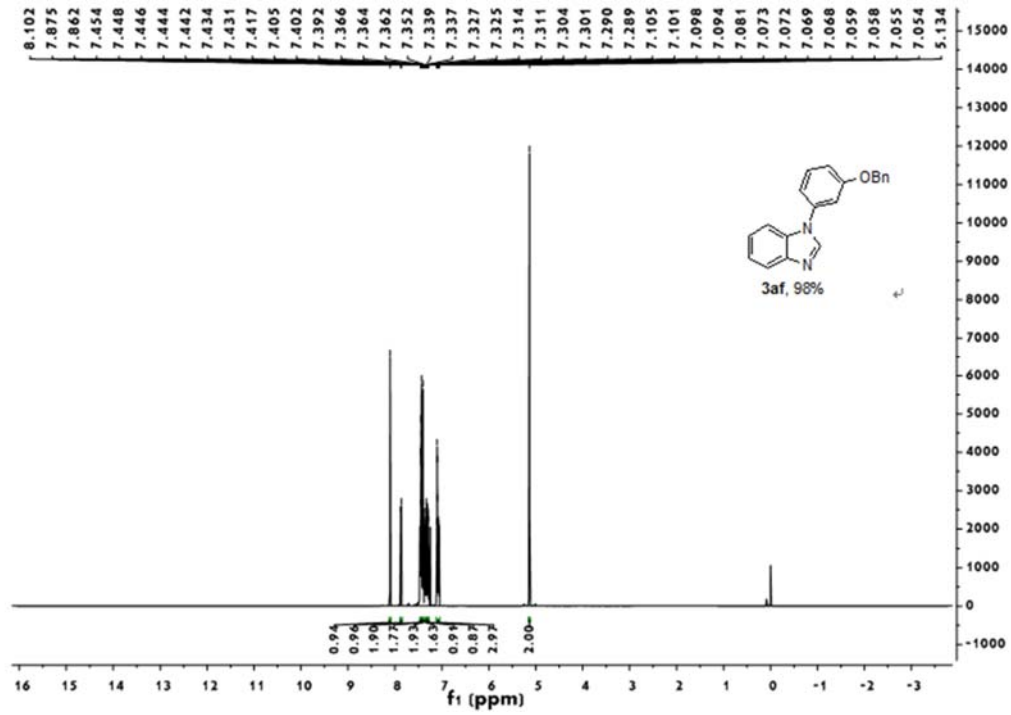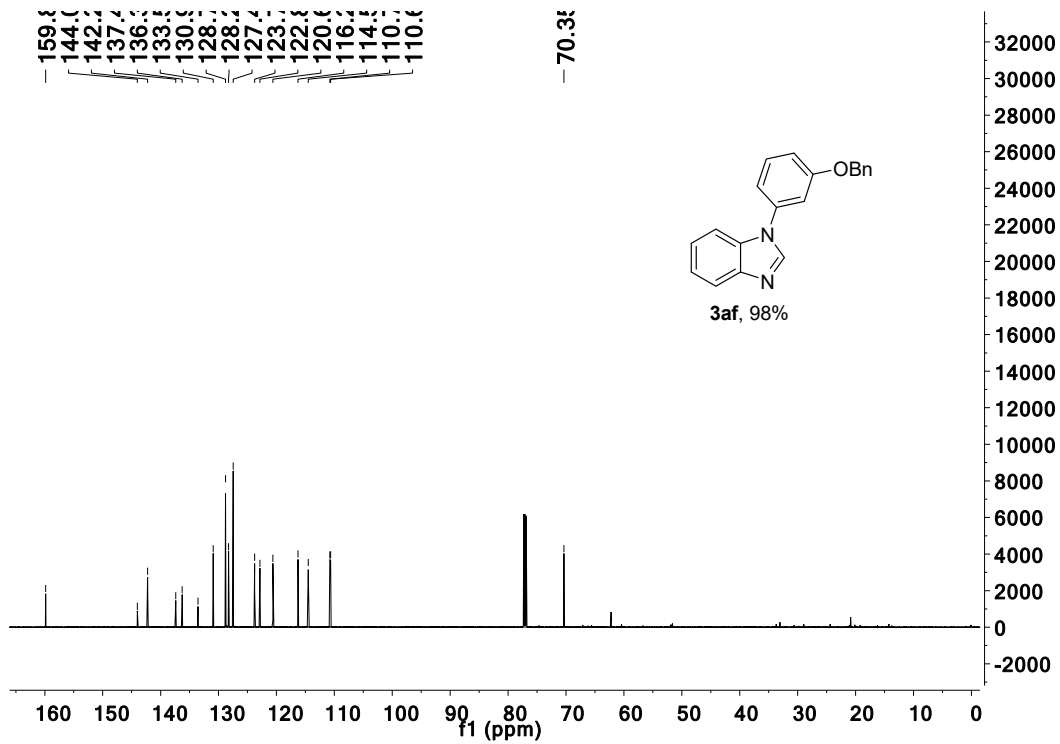



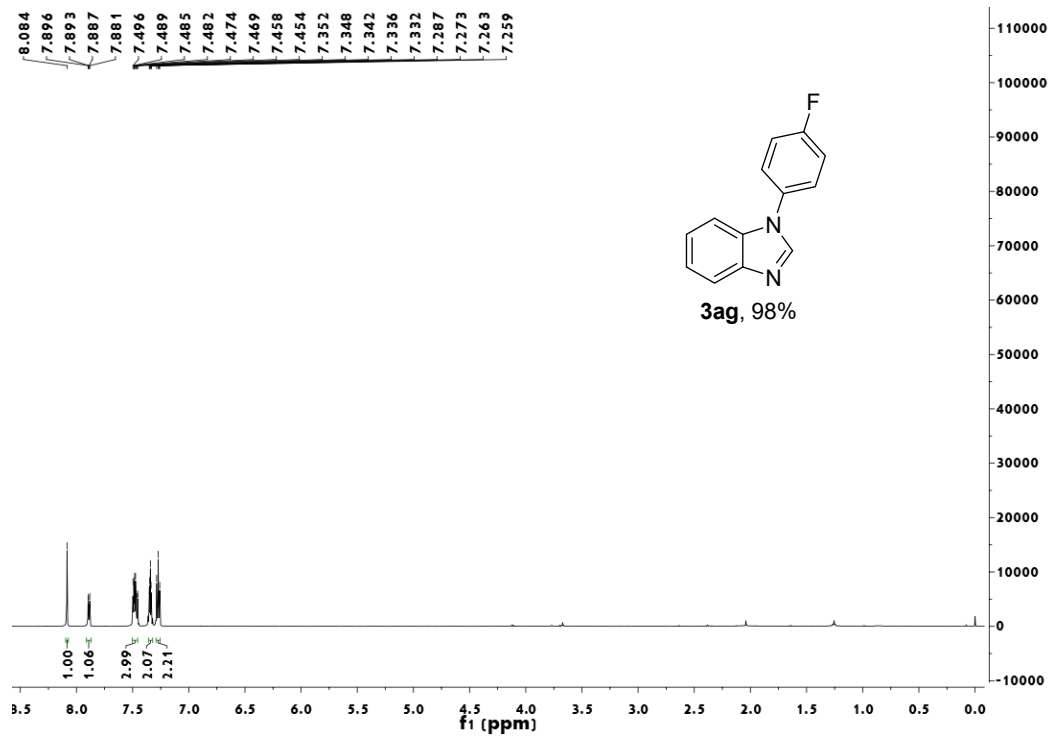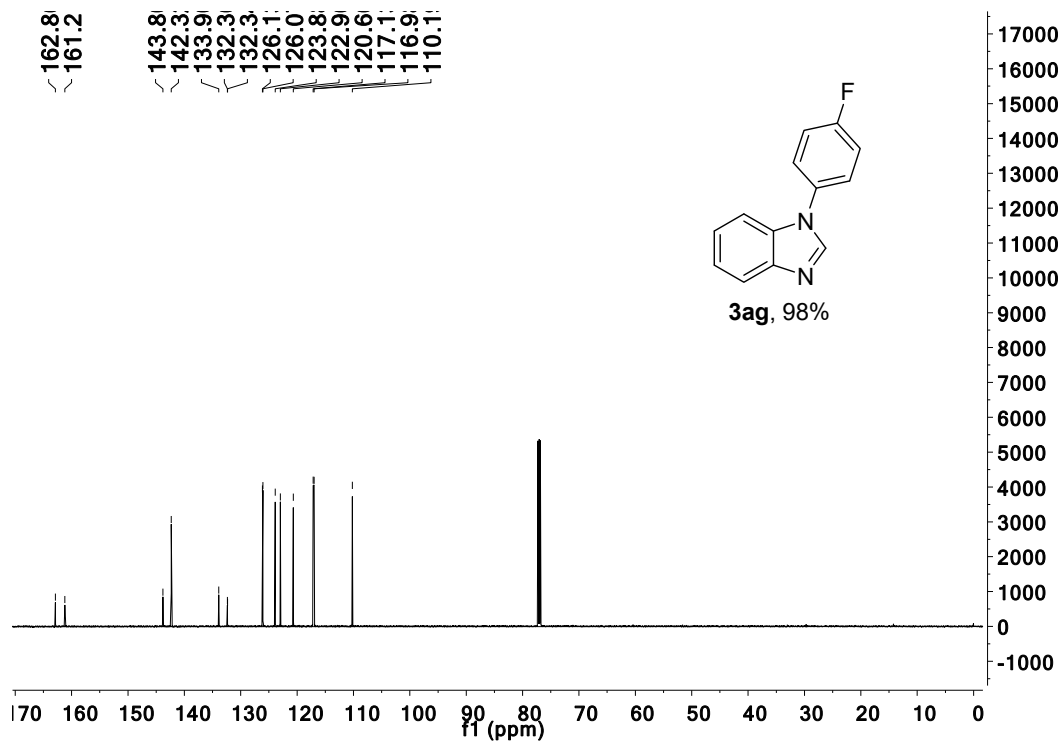

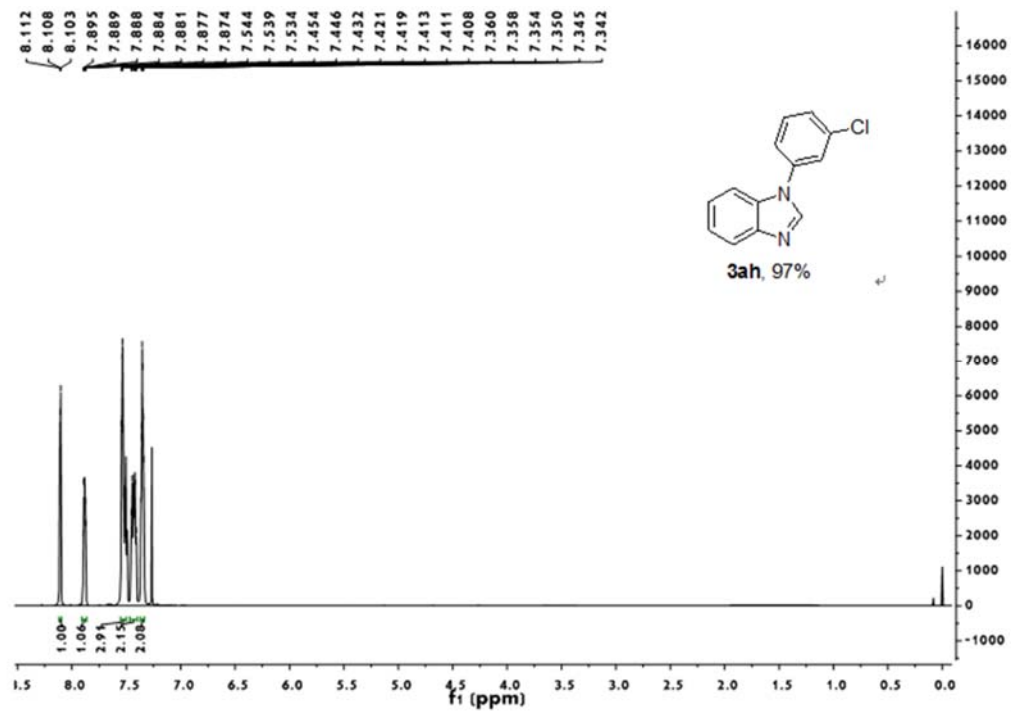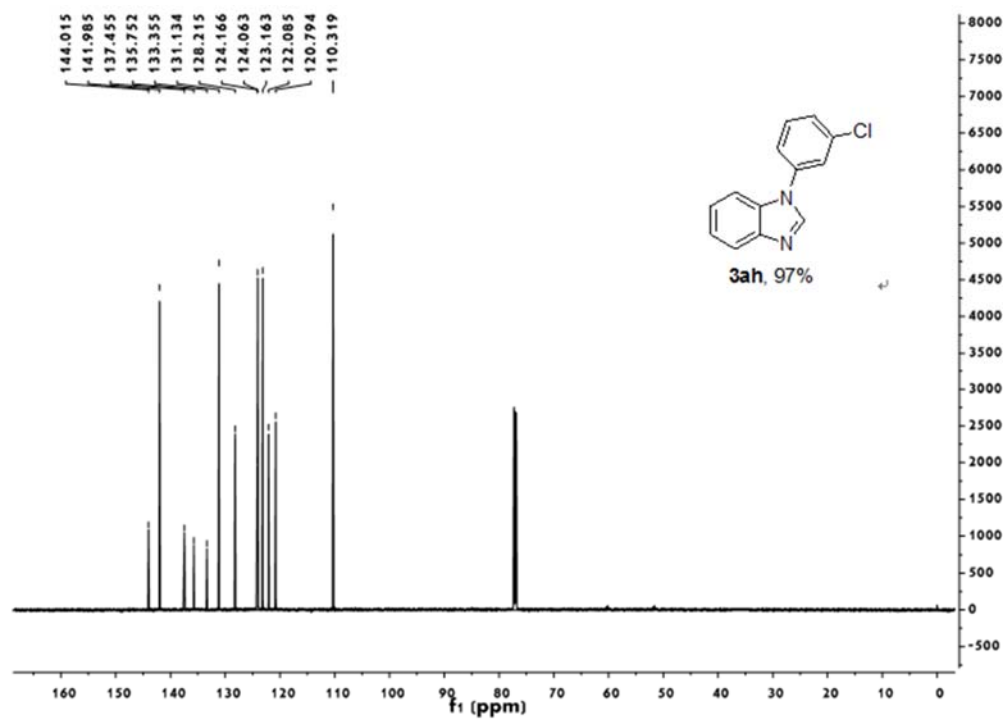

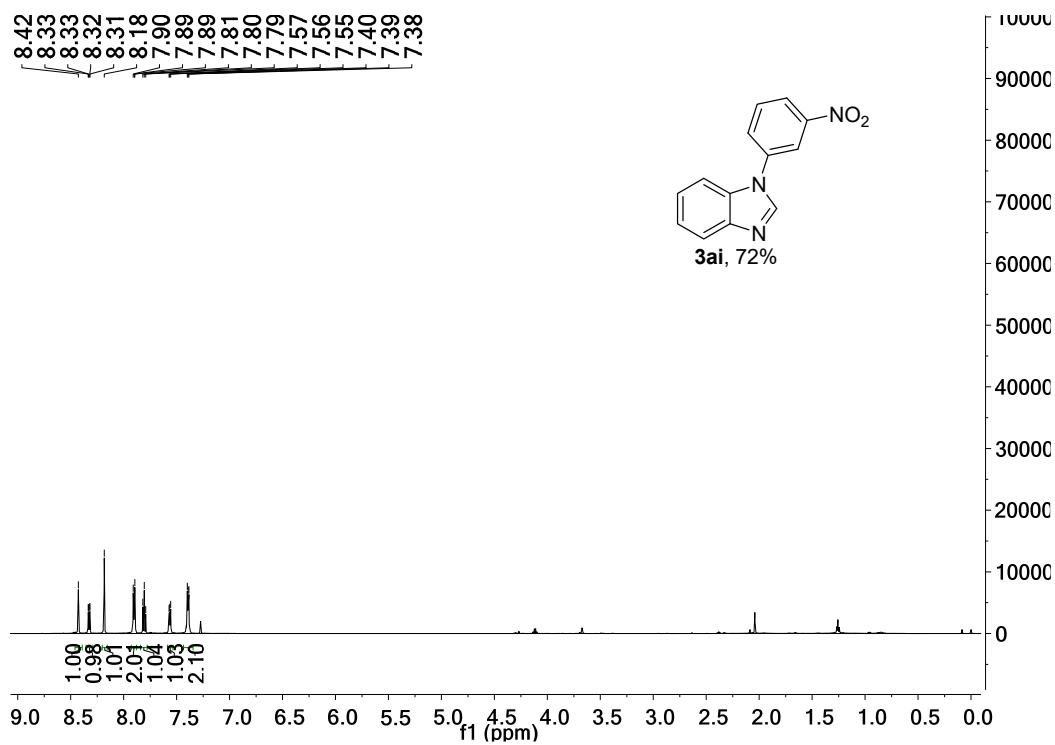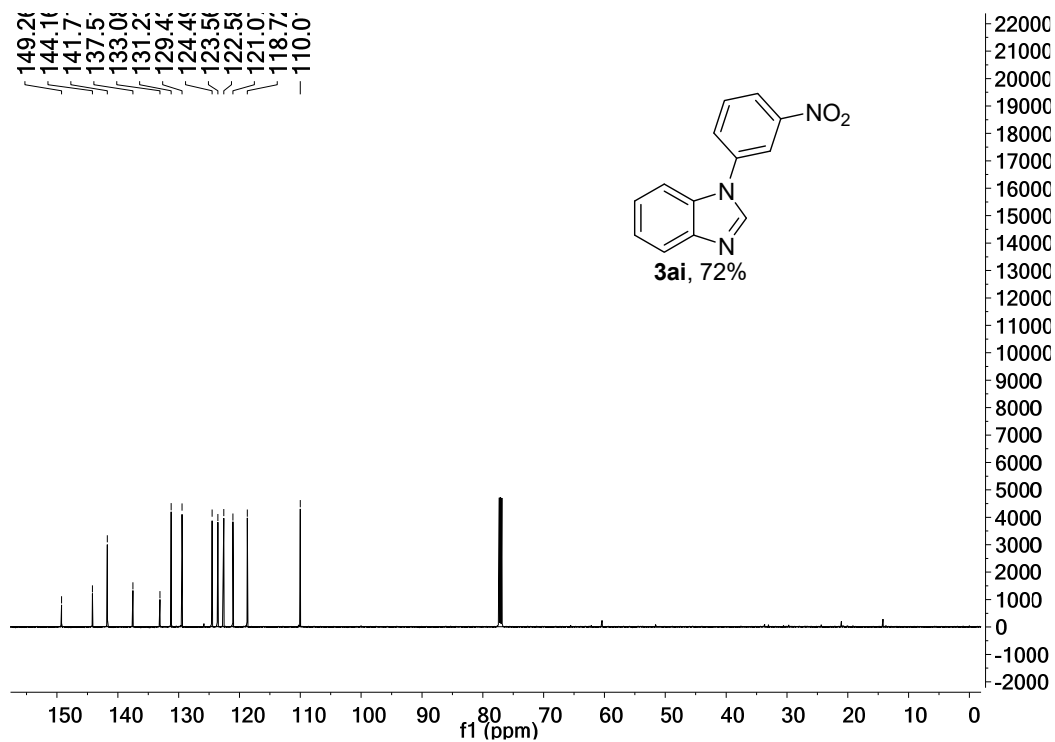

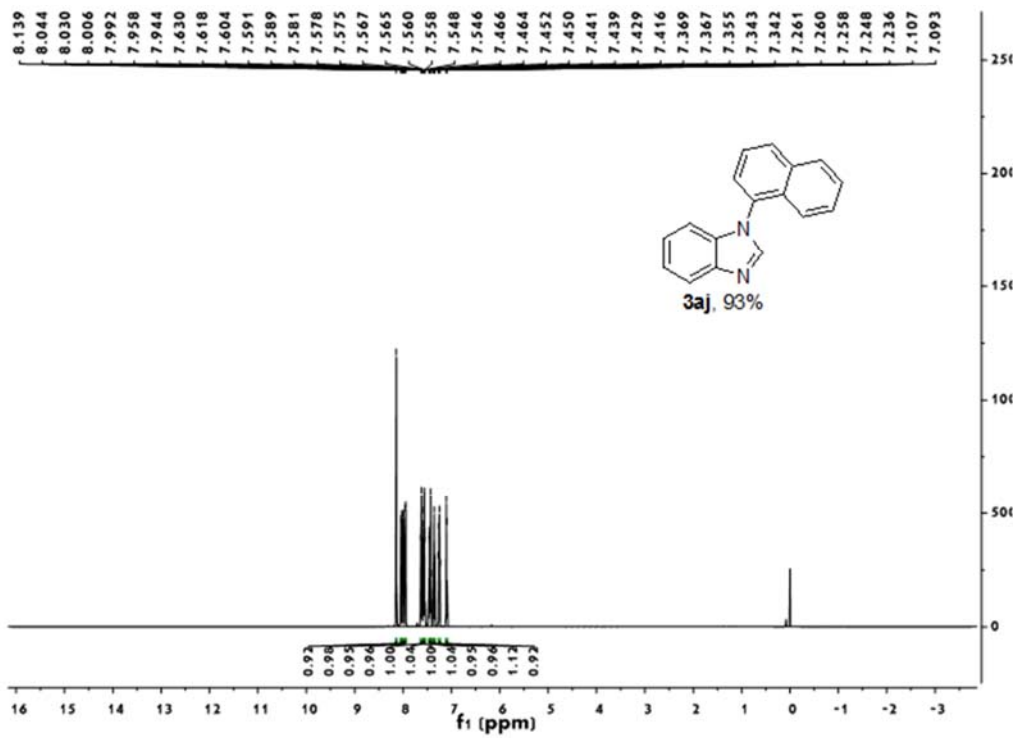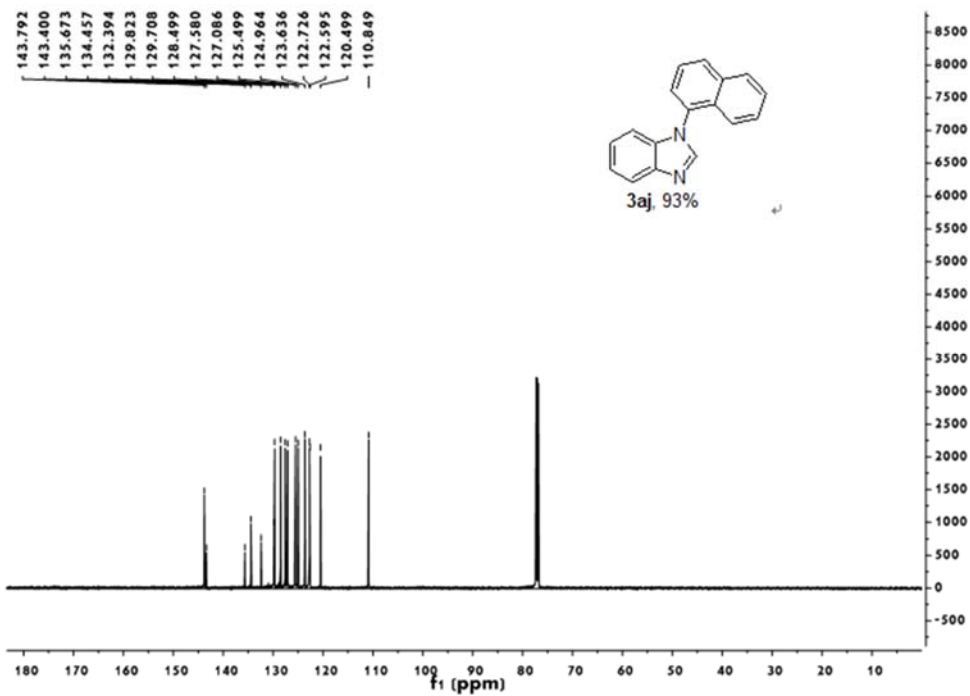

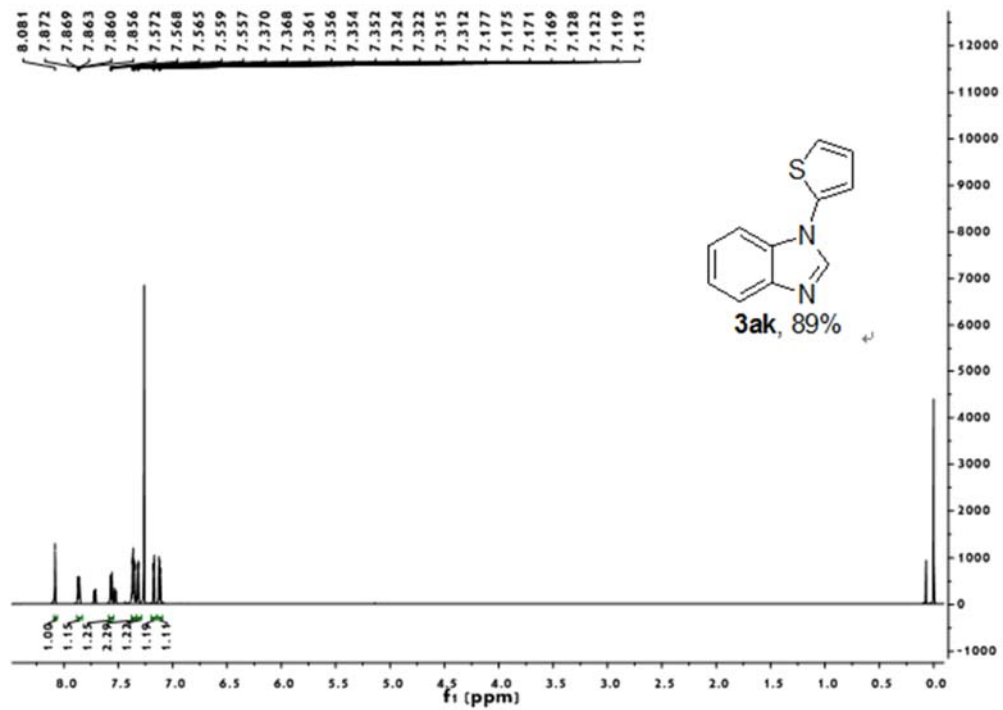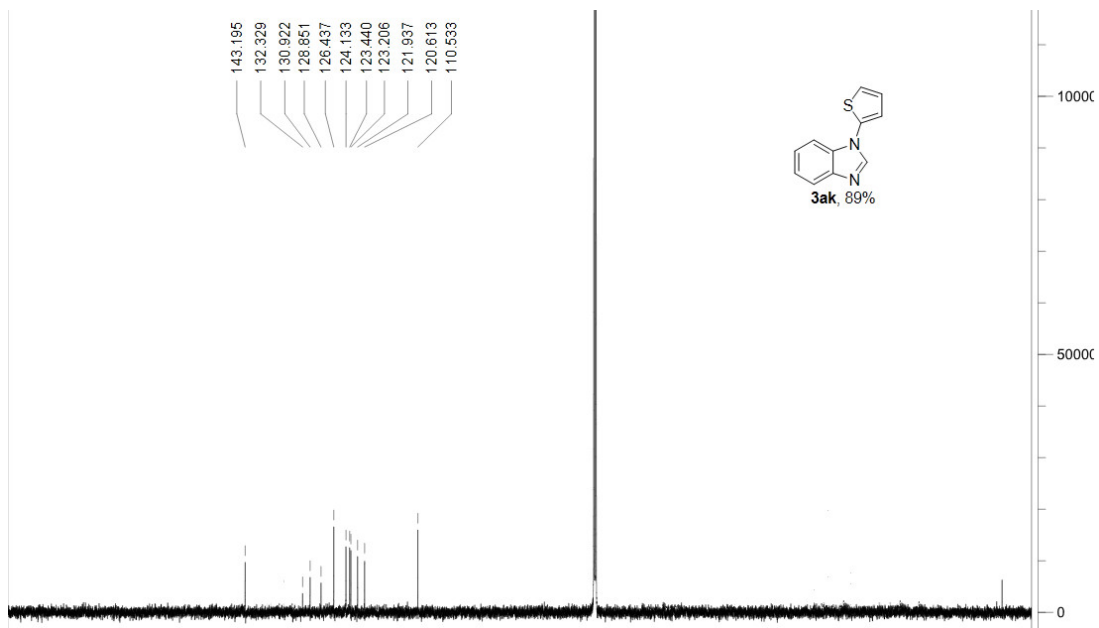

## 6. NMR Spectral Copies of the products (3ba-3ia)

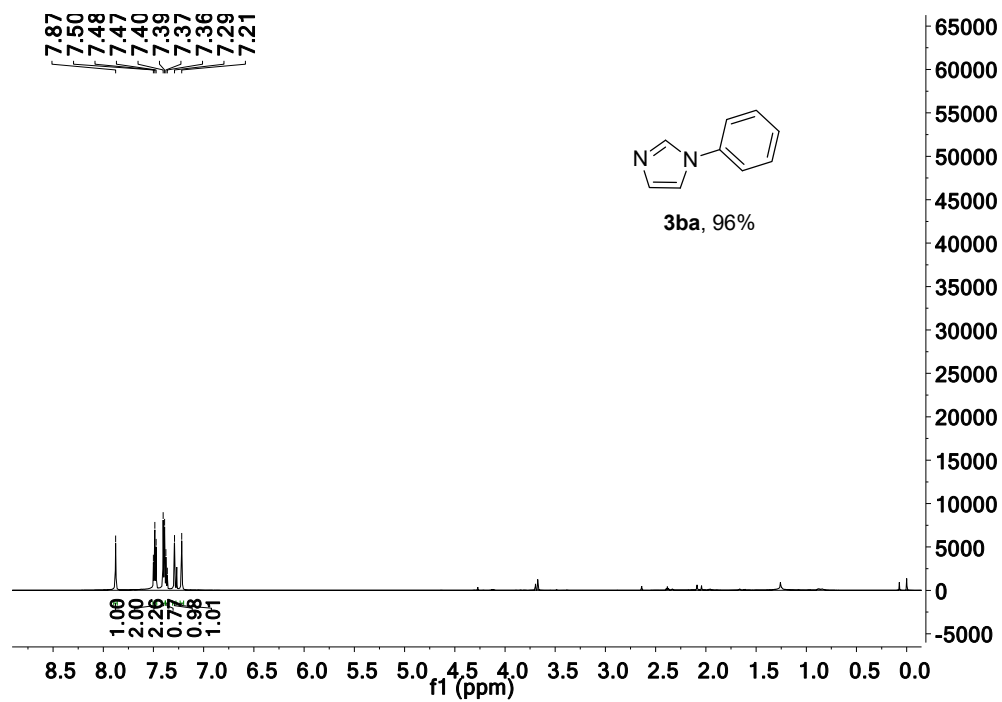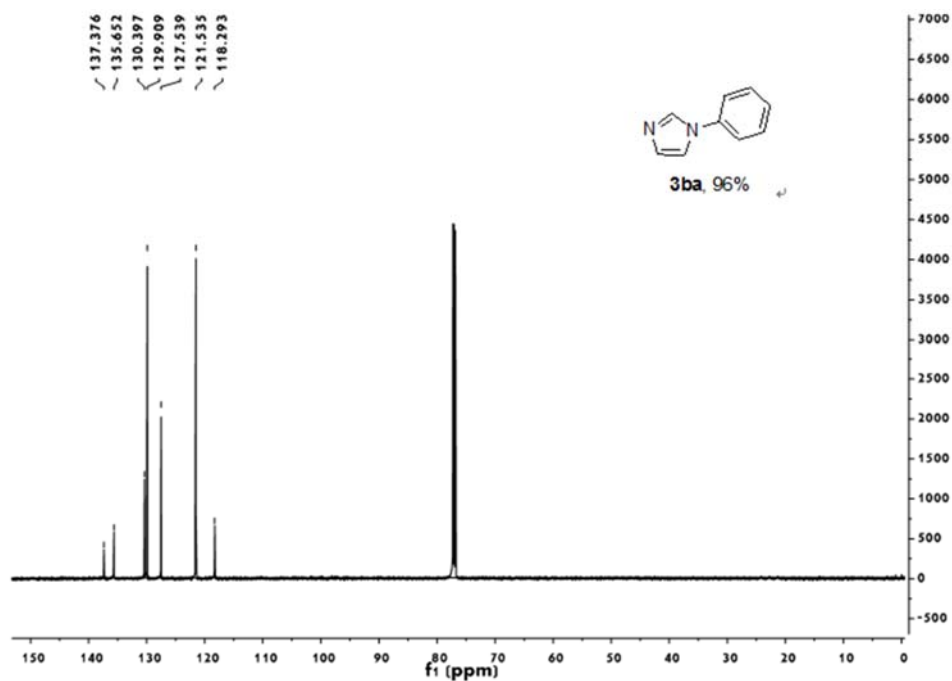

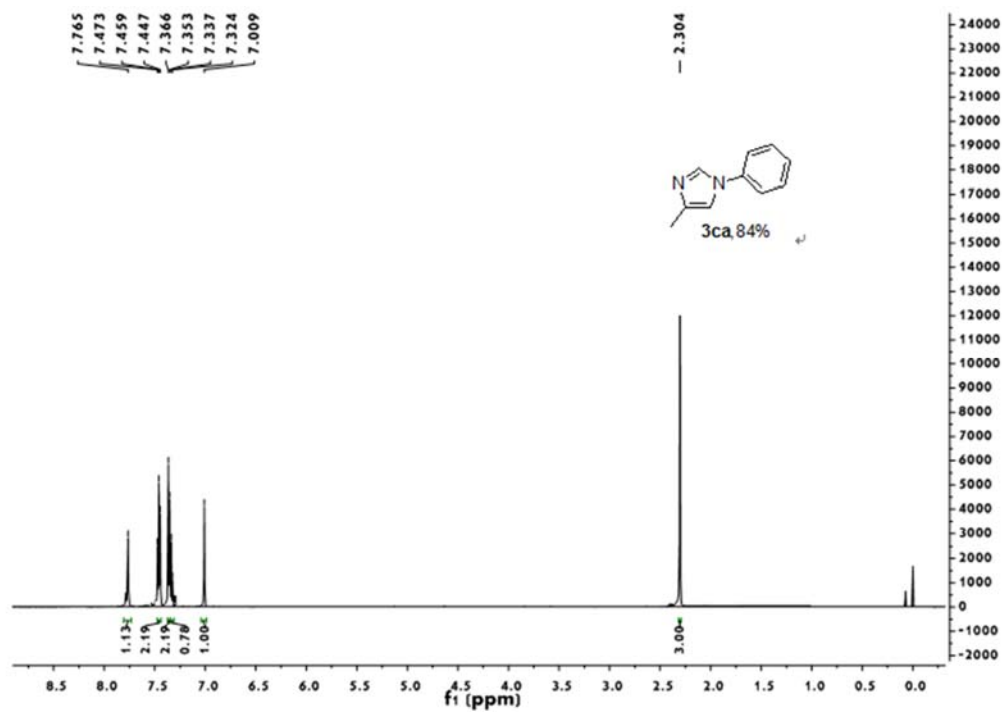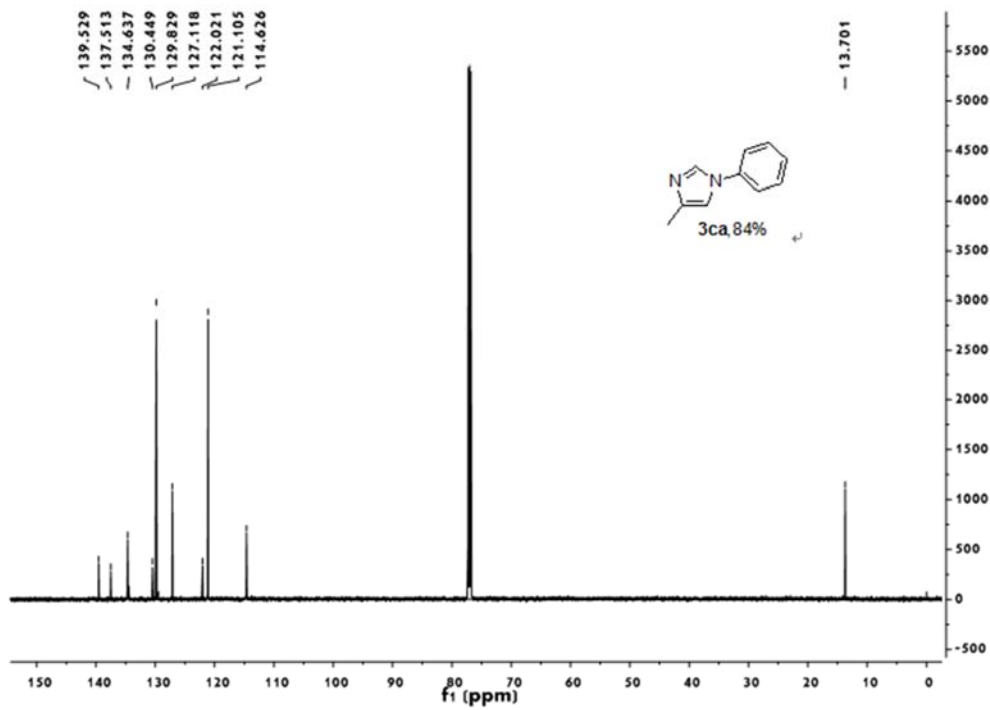

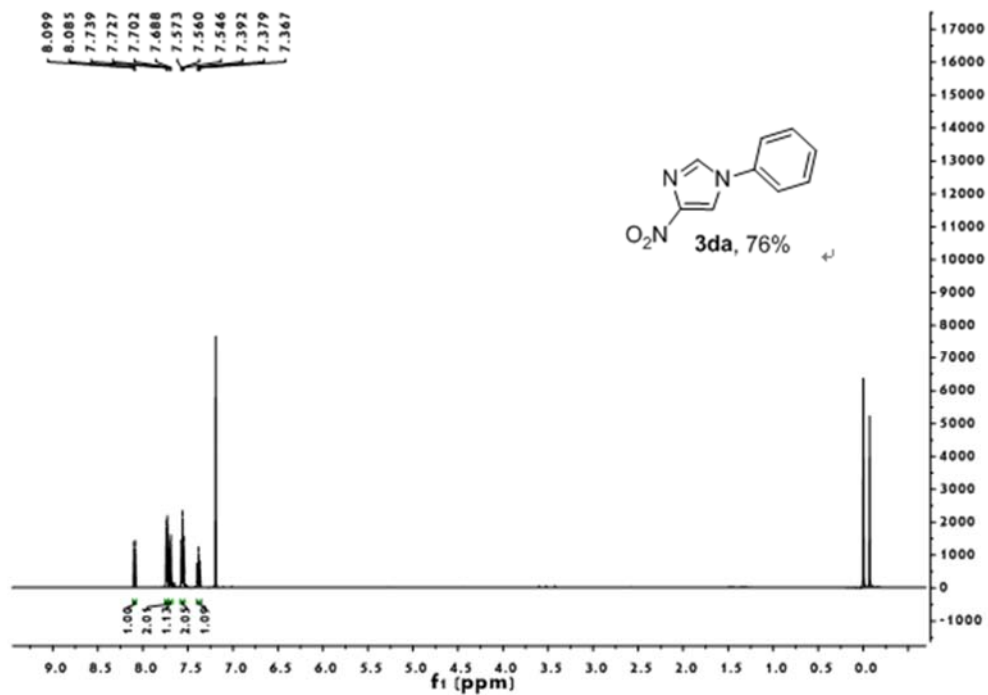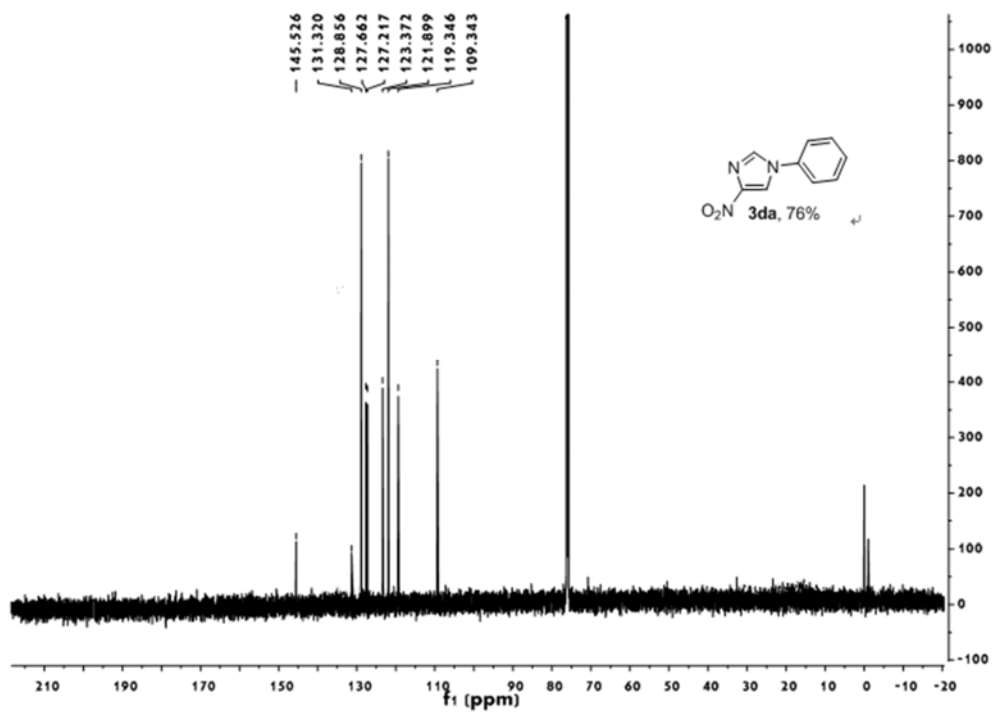



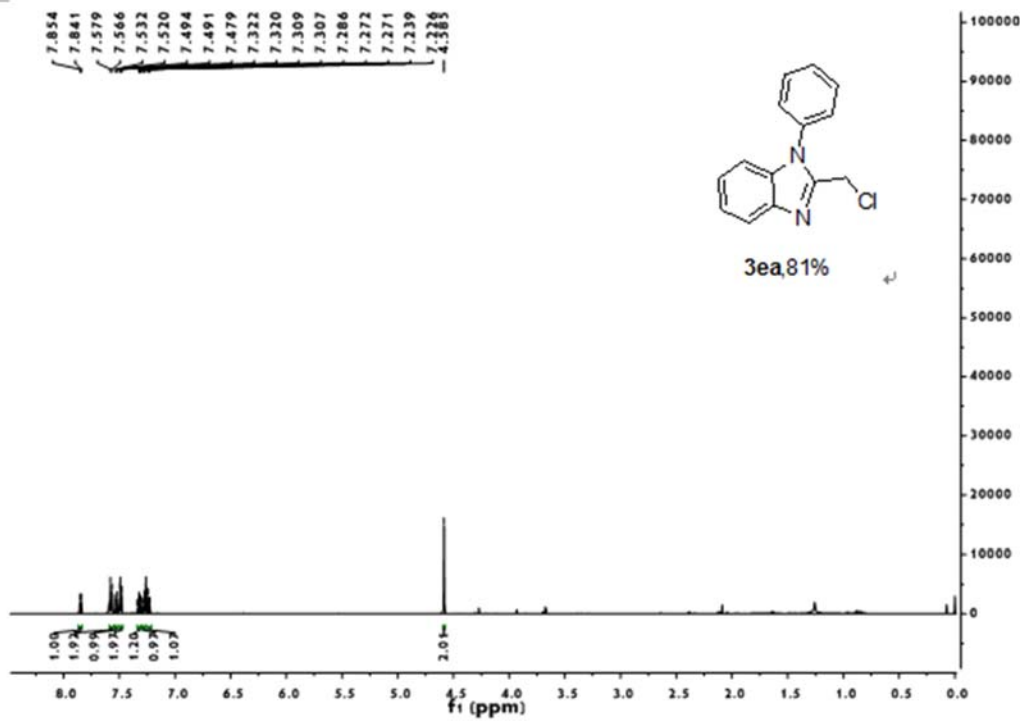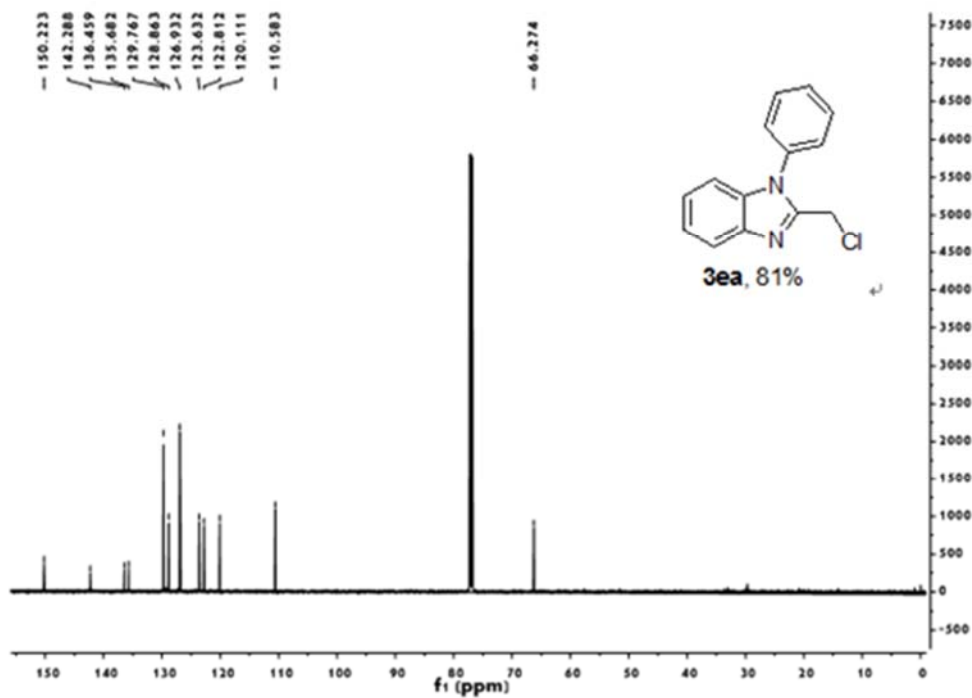

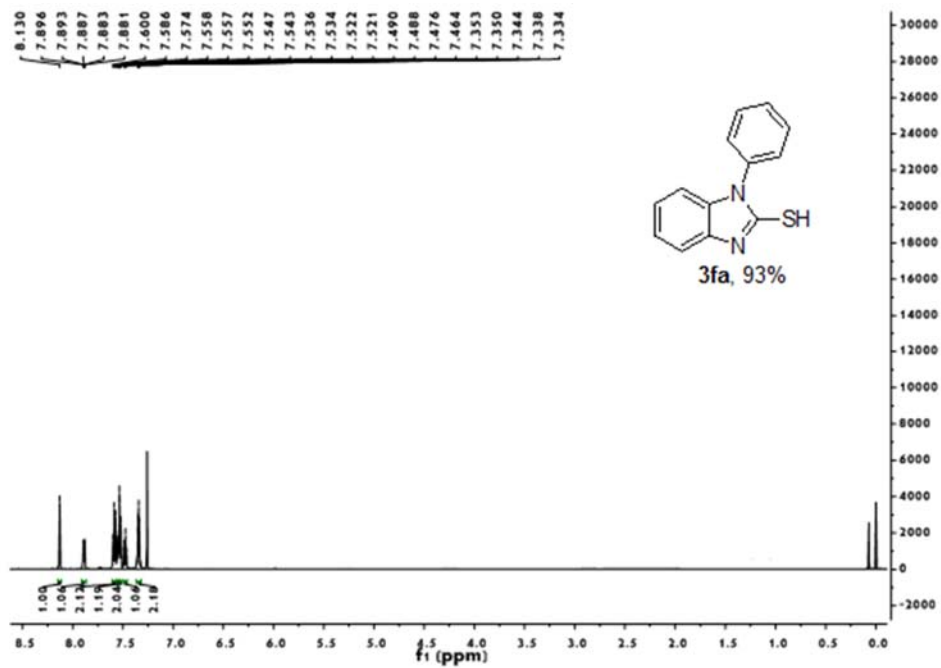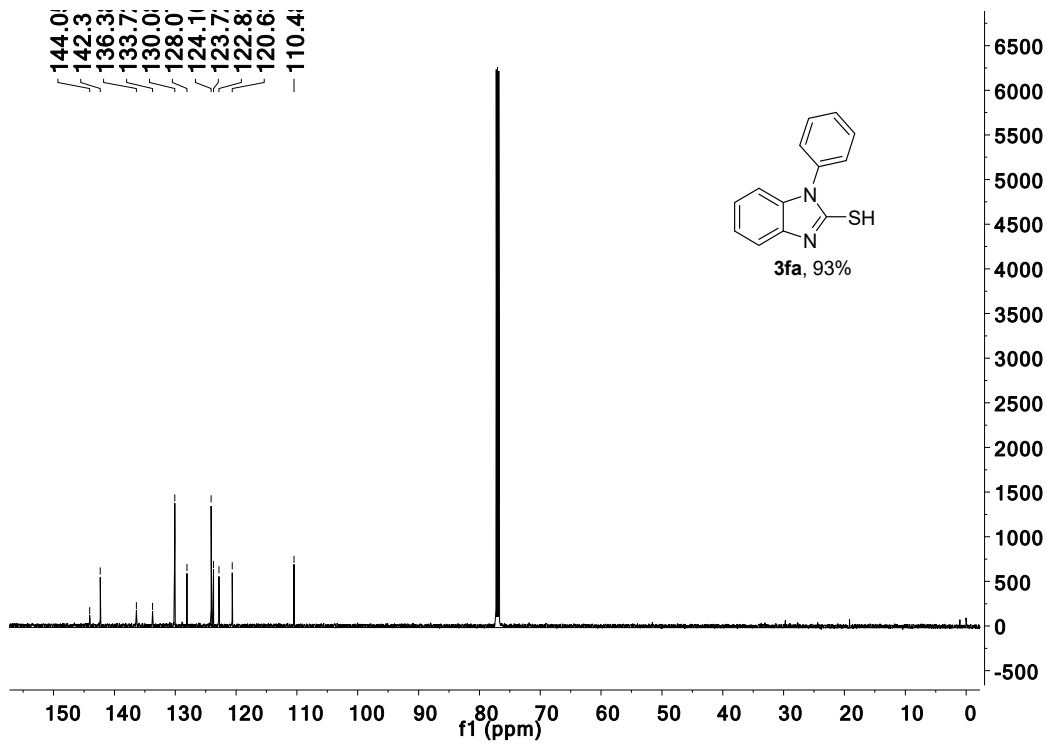

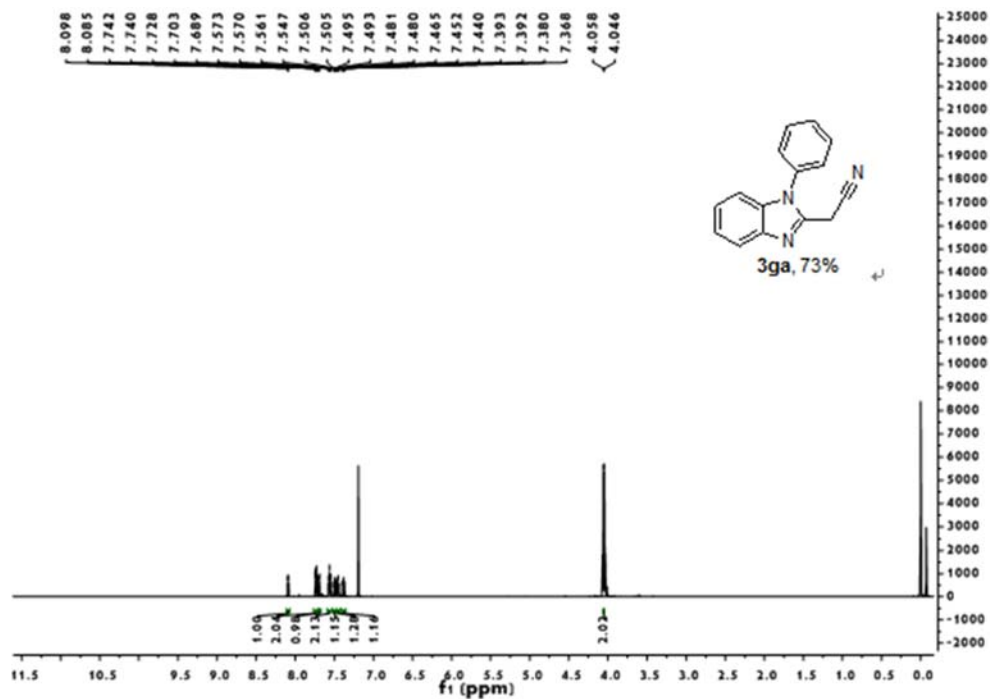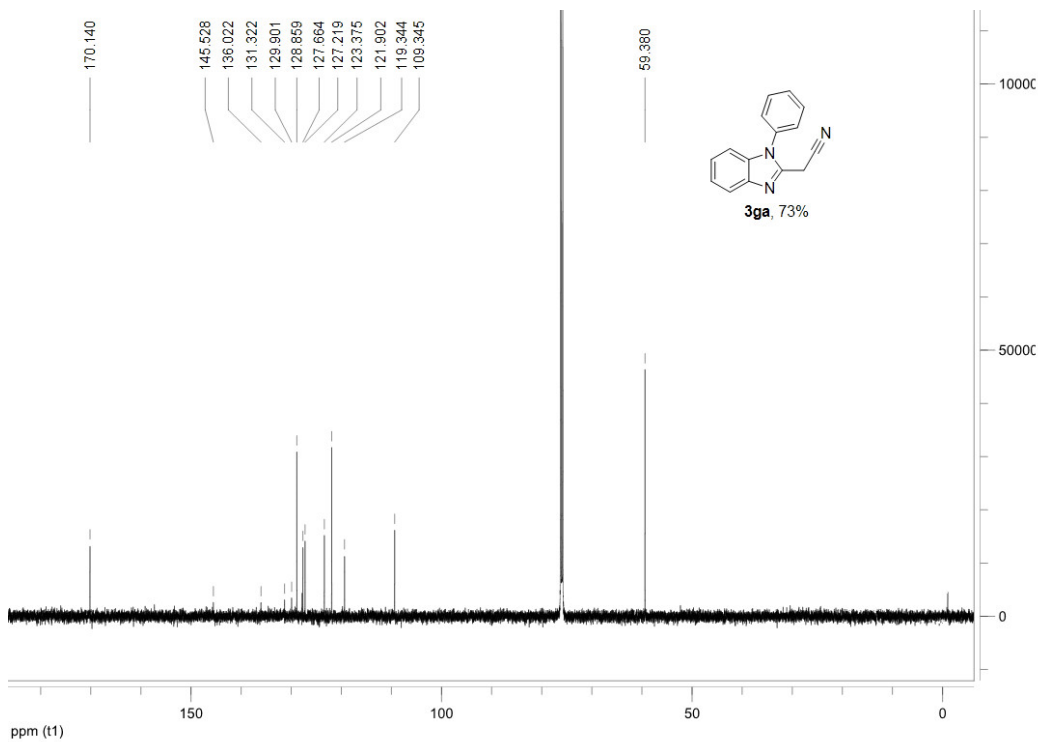

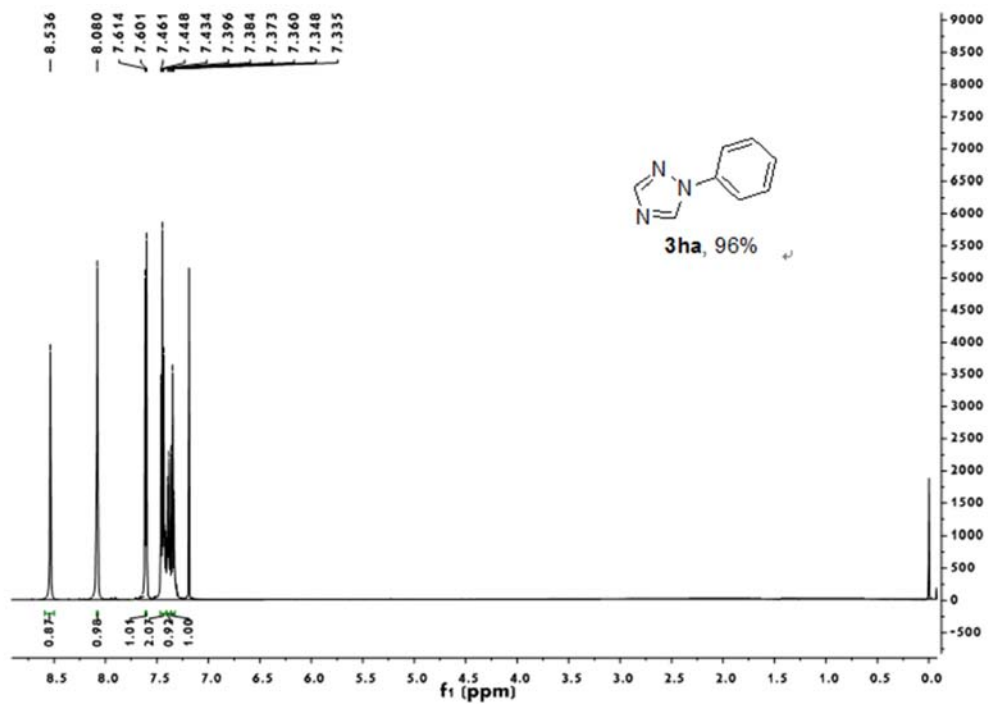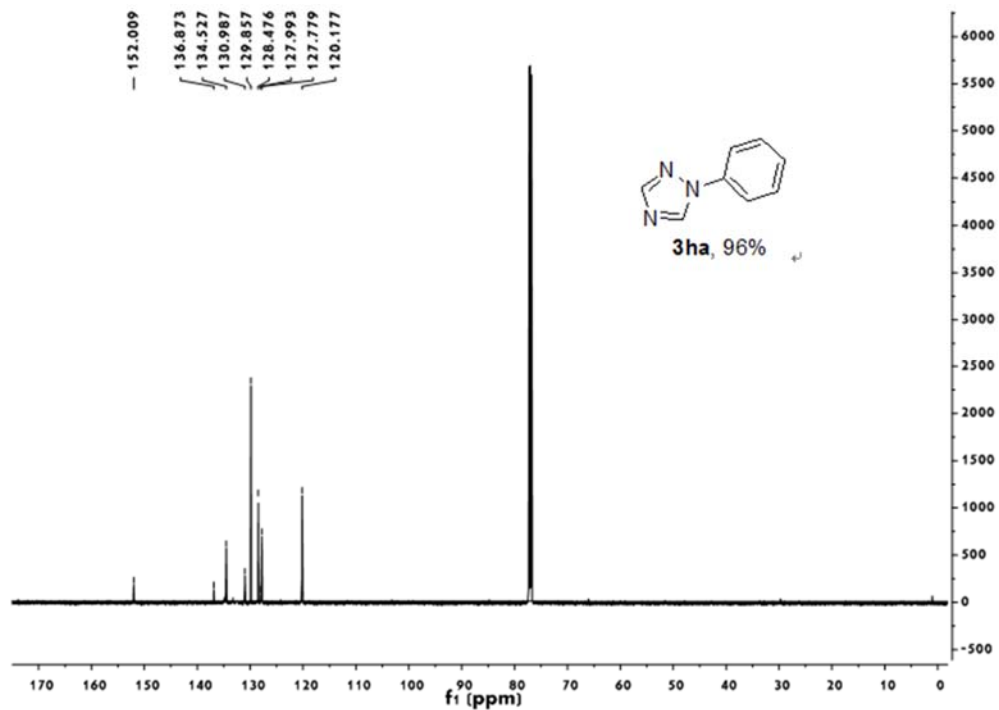

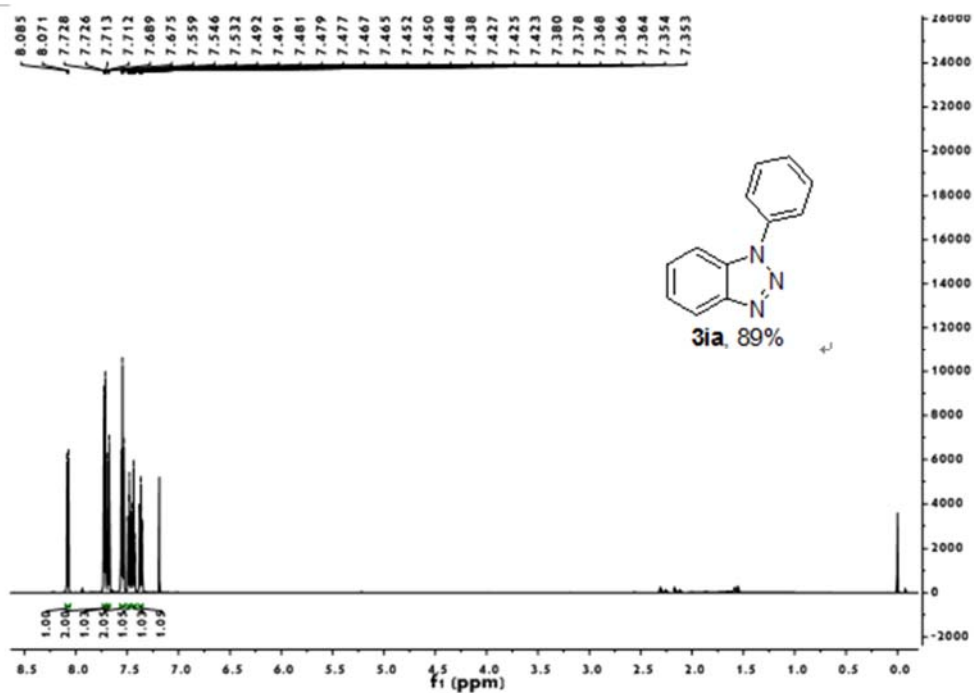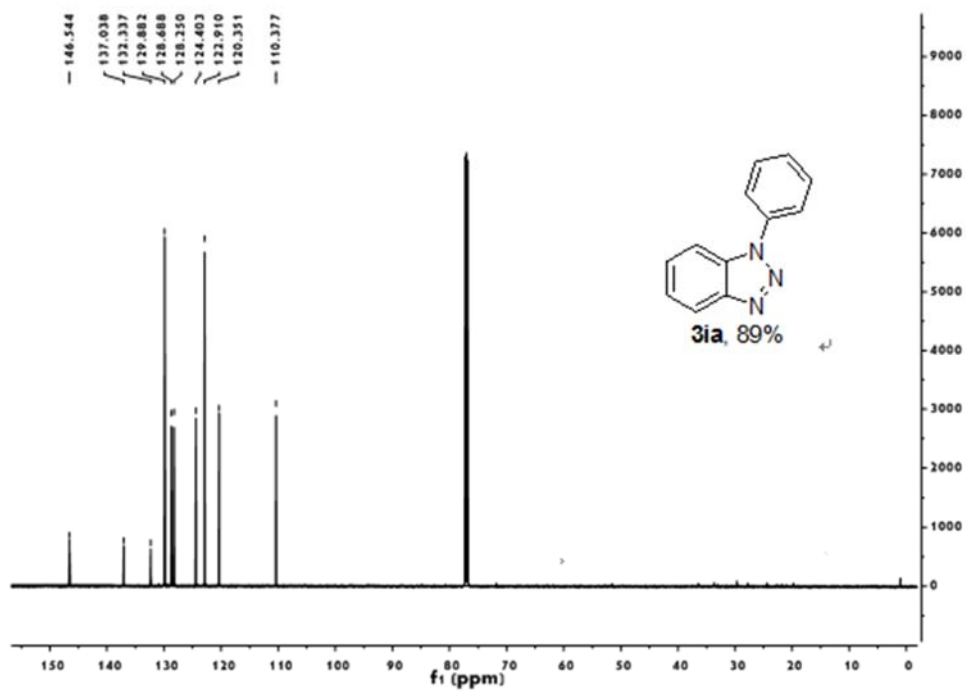

Supplement: c8ob02254b1.pdf [file c8ob02254b1.pdf]
